# Supplementary material
Source: publisher figshare collection journal article supplement (https://acs.figshare.com/ndownloader/files/25872206)
Supplement: Supplementary file 1 [file 25872206]

## **Supporting Information**

### **A Highly Selective Gas Sensor Based on Hydrophobic Silica Decorated with Trimethoxyoctadecylsilane**

Juan Xie\*, Lei Zhang, Biao Liu, Penghui Bai, Chenjie Wang, Jiake Xu, and Hu

Wang\*

*School of New Energy and Materials, Southwest Petroleum University (SWPU),  
Chengdu 610500, China*

\*Corresponding author.

*Tel.:* +86 28 83037480;

*Fax:* +86 28 83037480;

*E-mail address:* jxie@swpu.edu.cn (J. Xie); hwang@swpu.edu.cn (H. Wang).

# CONTENTS

|                                                               |     |
|---------------------------------------------------------------|-----|
| Chapter 1. Reviews .....                                      | S3  |
| Chapter 2. Materials and Instrumentation .....                | S8  |
| 2.1    Materials. ....                                        | S8  |
| 2.2    Instrumentation.....                                   | S8  |
| Chapter 3. Characterizations.....                             | S10 |
| 3.1    BET measurement. ....                                  | S10 |
| 3.2 $n_{\text{OTMS}}$ calculation. ....                       | S12 |
| Chapter 4. Sensing performance and Mechanism .....            | S14 |
| 4.1    Sensing performance. ....                              | S14 |
| 4.2    Sensing Mechanism.....                                 | S20 |
| 4.3    Repeatability and stability .....                      | S24 |
| 4.4    Fitting and Equations. ....                            | S31 |
| Chapter 5. Measurements .....                                 | S33 |
| 5.1    Gas distribution process. ....                         | S33 |
| 5.2    Sensing performance measurements.....                  | S33 |
| 5.3    Experiment environment and relative humidity test..... | S34 |
| Reference .....                                               | S37 |

# Chapter 1. Reviews

As for mesoporous silica, shown great potential for sensing applications, which has been widely researched. B.J. Melde<sup>1</sup> and J.E. Amonette<sup>2</sup> proposed reviews about mesoporous silica and silica aerogels materials in sensing. In order to improve the particular sensing performance of silica, modification of silica such as microstructure synthesis, surface functionalization and composites were deeply studied, which we concluded as Table S1.<sup>3-22,42</sup> Besides, the alkyl decorated silica materials were also widely researched, which were applied in multiple fields (shown as Table S2).<sup>23-38</sup> Z.K. Wang et al. fabricated the hexadecyl decorated silica by chemical co-immobilization method, which could selectively adsorb bisphenol A from aqueous solution. M.S. Milla et al.<sup>27</sup> successfully synthesized ammonium alkyl chains decorated silica, which exhibited excellent antibacterial property. D.N. Huang et al.<sup>37</sup> prepared octadecyltriethoxysilane decorated silica by three-steps method, which could efficiently enrich the phthalates. There were few reports about the trimethoxyoctadecylsilane (OTMS) alkyl group, which were applied in superhydrophobic material when decorated with CeO<sub>2</sub>,<sup>39</sup> antiwear ability of liquid paraffin when decorated with TiO<sub>2</sub>,<sup>40</sup> improving extraction efficiency for nonpolar benzene homologues when decorated with ZnO,<sup>41</sup> seldom did the report about decoration with silica and the application in gas sensing.

**Table S1.** Summary of modified silica applied in gas sensing.

| Materials                         | Synthesis method  | Sensor types               | Properties                                            | Ref. |
|-----------------------------------|-------------------|----------------------------|-------------------------------------------------------|------|
| Various microstructures of silica |                   |                            |                                                       |      |
| Ordered silica spheres            | Sol-gel method    | QCM                        | Selectively detected alcohol vapors                   | 3    |
| Hollow silica tube                | -                 | Interferometric gas sensor | Applied for gas-concentration analysis                | 4    |
| Polymer-clad silica               | Sol-gel method    | Fiber optic sensor         | Chlorinated hydrocarbons can be detected at low limit | 5    |
| Silica nanowire                   | -                 | Optical gas sensor         | Applied for the leakage detection of propane          | 6    |
| Microporous silica                | Slight alteration | Electrochemical sensor     | Applied for humidity sensor                           | 7    |
| Silica photonic crystal           | Sol-gel method    | Optical gas sensor         | Applied for gas-sensing with photonic bandgap shift   | 42   |
| Silica aerogel                    | Sol-gel method    | Electrochemical sensor     | Applied for humidity sensor                           | 8    |

| Surface functionalization of silica                                |                                   |                           |                                                      |    |
|--------------------------------------------------------------------|-----------------------------------|---------------------------|------------------------------------------------------|----|
| Metallo-porphyrin silica                                           | -                                 | Fiber optic sensor        | O <sub>2</sub> sensing for long term use in jet fuel | 9  |
| PDA-HMSSs <sup>a</sup>                                             | Adjust the dopamine concentration | QCM                       | Selectively detected HCHO in food                    | 10 |
| DAP <sup>b</sup> -silica aerogel                                   | Co-gelation process               | Optical gas sensor        | Applied for O <sub>2</sub> sensing                   | 11 |
| 4-BMC <sup>c</sup> -silica aerogel                                 | SCR <sup>d</sup>                  | Optical gas sensor        | Applied for O <sub>2</sub> sensing                   | 12 |
| PtOEP <sup>e</sup> -silica aerogel                                 | -                                 | Optical gas sensor        | Applied for O <sub>2</sub> sensing                   | 13 |
| PANI-silica aerogel                                                | Kaner's rapid mixing process      | Chemiresistive gas sensor | Applied for HCl and NH <sub>3</sub> sensing          | 14 |
| MTMS <sup>f</sup> -silica                                          | One-pot method                    | Optical gas sensor        | Applied for TNT sensing                              | 15 |
| Silica composite materials (includes doping, core-shell structure) |                                   |                           |                                                      |    |
| CeO <sub>2</sub> /SiO <sub>2</sub>                                 | Sol-hydrothermal route            | Chemiresistive gas sensor | Enhanced NH <sub>3</sub> gas-sensing                 | 16 |
| C/SiO <sub>2</sub>                                                 | Template-carbonization strategy   | QCM                       | Showed excellent sensing performances to indoor VOCs | 17 |

|                                                 |                          |                                |                                                                  |    |
|-------------------------------------------------|--------------------------|--------------------------------|------------------------------------------------------------------|----|
| NiO/Au/SiO <sub>2</sub>                         | Sol-gel method           | SAW                            | Selectively recognized H <sub>2</sub> in the presence of CO      | 18 |
| SiO <sub>2</sub> ·xZrP <sup>g</sup>             | Vacuum drying method     | Solid state sensor             | Detected O <sub>2</sub> at room temperature in a dry environment | 19 |
| SiO <sub>2</sub> /ZnO core/shell                | In a triton X-100 system | Chemiresistive gas sensor      | Highly selective to ethanol                                      | 20 |
| Ru(bpy) <sub>3</sub> <sup>2+</sup> doped silica | Slight modification      | Electrochemiluminescent sensor | Selective detection for H <sub>2</sub> S                         | 21 |
| ZnO/silica foam                                 | -                        | Optical gas sensor             | Applied for ethanol gas sensor                                   | 22 |

---

<sup>a</sup> PDA-HMSSs: poly-dopamine functionalized hollow mesoporous silica spheres. <sup>b</sup> DAP: N-(3-trimethoxysilylpropyl)-2,7-diazapyrenium. <sup>c</sup> 4-BMC: 4-Benzoyl-N-methylpyridinium cation. <sup>d</sup> SCR: sonogashira coupling reaction. <sup>e</sup> PtOEP: platinum octaethylporphine. <sup>f</sup> MTMS: methyltrimethoxysilane. <sup>g</sup> SiO<sub>2</sub>·xZrP: silica-zirconium phosphate-phosphoric acid composites.

---

**Table S2.** Summary of application of alkyl decorated silica.

| Alkyl groups                                                                  | Silica microstructures | Synthesis method           | Fields of application                           | Ref. |
|-------------------------------------------------------------------------------|------------------------|----------------------------|-------------------------------------------------|------|
| C1Q <sup>a</sup> , C4Q <sup>b</sup> , C12Q <sup>c</sup> and C18Q <sup>d</sup> | Mesoporous silica      | Surface modification       | Selective nitrate removal from aqueous solution | 23   |
| Cobalt(II) alkyl phosphonate                                                  | Mesoporous MCM-41      | -                          | Selective oxidations of allylic alcohols        | 24   |
| Vanadyl alkyl phosphonate                                                     | Silica                 | -                          | Selective oxidation of sulfides to sulfoxides   | 25   |
| Dodecyl                                                                       | MCM-41                 | Hydrothermal synthesis     | Molecular selective adsorption from water       | 26   |
| Hexadecyl                                                                     | Silica                 | Chemical co-immobilization | Bisphenol A adsorption from aqueous solution    | 27   |
| C18 alkyl                                                                     | Silica gels            | Surface coverage           | Research on the conformational order of C18     | 28   |
| C16 <sup>e</sup>                                                              | Colloidal silica       | -                          | Research on charging of silica in apolar media  | 29   |
| Ammonium alkyl chains                                                         | Silica                 | -                          | Research on the antibacterial properties        | 30   |
| Short alkyl chains                                                            | Silica NPs             | Carbodiimide chemistry     | Research on the moderate activation             | 31   |

|                       |                                |                      |                                                |           |
|-----------------------|--------------------------------|----------------------|------------------------------------------------|-----------|
| C6, C10 and C16 alkyl | Silica                         | Sol-gel method       | Research on the thermal properties             | 32        |
| C18 <sup>f</sup>      | Silica                         | Surface modification | Research on the improved separation efficiency | 33        |
| C18 cartridges        | Silica                         | -                    | Research on the adsorption towards pesticides  | 34        |
| C18 (unknown)         | Silica                         | -                    | Research on the adsorption of peptide          | 35        |
| C18 (unknown)         | Silica                         | -                    | Rapid detecting metal ions by chromatography   | 36        |
| C18 <sup>g</sup>      | Graphene-silica                | Three-steps method   | Efficient enrichment of phthalates             | 37        |
| C18 (OTMS)            | Monolayer SiO <sub>2</sub> /Si | CVD                  | Research on the synthesis                      | 38        |
| C18 (OTMS)            | Mesoporous silica              | Surface modification | Selective gas sensing                          | This work |

---

<sup>a</sup> C1Q: trimethy[3-(trimethoxysilyl)propyl] ammonium chloride. <sup>b</sup> C4Q: dimethylbuty[3-(trimethoxysilyl)propyl] ammonium chloride. <sup>c</sup> C12Q: dimethyldodecy[3-(trimethoxysilyl)propyl] ammonium chloride. <sup>d</sup> C18Q: dimethyloctadecy[3-(trimethoxysilyl)propyl] ammonium chloride. <sup>e</sup> C16: hexadecyltrimethoxysilane. <sup>f</sup> C18: chlorodimethyloctadecylsilane. <sup>g</sup> C18: octadecyltriethoxysilane.

---

## **Chapter 2. Materials and Instrumentation**

### **2.1 Materials.**

All chemical reagents and solvents were purchased from Kelong Chemical Reagent Co., Ltd. (Chengdu, China) and used as received without further purification. Deionized (DI) water was obtained from a Milli-Q water purification system. High purity gases (99.9999%) including oxide, nitrogen, argon and carbon dioxide, were obtained from Jinnengda Co., Ltd. (Chengdu, China). Premixed gas tank of hydrogen with the concentration of 5% (95% argon) was purchased from Jinnengda Co., Ltd. (Chengdu, China).

### **2.2 Instrumentation.**

Scanning electron microscopy (SEM) images were collected from a scanning electron microscope (Zeiss EVO MA15) at an acceleration voltage of 10 kV. The size of crystals was calculated from SEM images of different areas of the same sample by using ImageJ software.

Mass Flow Controller (MFC) and syringes were provided by Ristron Co., Ltd (Jiaxing, China). Quartz Crystal Microbalance (QCM) of SRS 200 was purchased from Deshang Co., Ltd. (Tianjin, China).

Fourier transform infrared reflection (FTIR) spectrum (WQF520) was provided by Ruili Co., Ltd (Beijing, China).

Automatic contact angle tester (OCA25) was provided by Dataphysics Instruments GmbH. Contact Angle (CA) was measured by attached software.

Volumetric N<sub>2</sub> sorption measurements were carried out at 77 K by using gas adsorption system (Quantachrome QuadraSorb-SI2000-09). Specific surfaces areas were calculated from the N<sub>2</sub> adsorption data according to the Brunauer-Emmett-Teller (BET) method. Cumulative pore volumes and pore diameters were calculated from the adsorption isotherms by the Barrett-Joyner-Halenda (BJH) method.

## Chapter 3. Characterizations

### 3.1 BET measurement.

Representative N<sub>2</sub> sorption isotherm of undecorated silica was shown as Figure S1. Considering the decoration process would not change the formation of silica, representative N<sub>2</sub> sorption isotherm of OTMS decorated silica could also be illustrated by Figure S1. Because the N<sub>2</sub> isotherm illustrated typical type III behavior with silica, capillary condensation of VOC vapors was a major factor of adsorption behavior in the Replacing model. When silica PCs were exposed to the alcohol vapors, the replacement of reference-gas molecules with alcohol molecules occurred, forming a saddle-shaped liquid-vapor interface between two touching silica spheres, where the Replacing model was employed to explain the sensing mechanism.

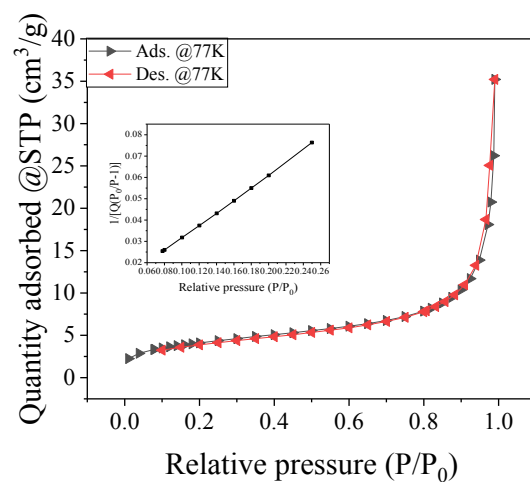

**Figure S1.** Representative N<sub>2</sub> sorption isotherm of undecorated silica.<sup>3</sup>

**Surface area**=14.6653±0.1048 m<sup>2</sup>/g

**Slope**=0.294622±0.002096 g/cm<sup>3</sup>

**Intercept**=0.002173±0.000326

**Correlation coefficient, R<sup>2</sup>**=0.9998230

**Constant**=136.563805

**Pore volume**=0.054097 cm<sup>3</sup>/g

### 3.2 $n_{\text{OTMS}}$ calculation.

The results of  $n_{\text{OTMS}}$  calculation was shown as Table S3. According to Sauerbrey equation (shown as Equation (1) in manuscript), Frequency shift can be easily changed into Mass shift.

$$\text{Silica weight} = (\text{Coated F} - \text{Original F})/0.0566$$

$$\text{OTMS weight} = (\text{Decorated F} - \text{Coated F})/0.0566$$

$$n_{\text{OTMS}} = \text{OTMS weight}/(\text{Silica weight} + \text{OTMS weight}) \times 100\%$$

where Original F is the frequency of uncoated QCM chip when exposing to dry nitrogen. Coated F refers to the frequency of QCM chip coated with undecorated silica and OTMS decorated silica film when exposing to dry nitrogen.

So far, the content of OTMS when decoration time is 2 h, 4 h, 6 h and 8 h, respectively can be calculated as 2.62 wt%, 2.74 wt%, 3.00 wt% and 4.37 wt%.

**Table S3.** Original F, Coated F, Decorated F, Silica weight, OTMS weight,  $n_{\text{OTMS}}$  of undecorated silica and OTMS decorated silica.

| Decoration<br>time (h) | Original<br>F (Hz) | Coated F<br>(Hz) | Decorated<br>F (Hz) | Silica<br>weight<br>(ng/cm <sup>2</sup> ) | OTMS<br>weight<br>(ng/cm <sup>2</sup> ) | $n_{\text{OTMS}}$<br>(wt%) |
|------------------------|--------------------|------------------|---------------------|-------------------------------------------|-----------------------------------------|----------------------------|
| 0 <sup>[3]</sup>       | 5002641            | 4939500          | -                   | 1115565.37                                | -                                       | -                          |
| 2                      | 5000809            | 4992532          | 4992309             | 146236.75                                 | 3939.93                                 | 2.62                       |
| 4                      | 5000032            | 4875330          | 4974634             | 436431.10                                 | 12296.82                                | 2.74                       |
| 6                      | 4999328            | 4981790          | 4981248             | 309858.66                                 | 9575.97                                 | 3.00                       |
| 8                      | 4998079            | 4987936          | 4987472             | 179204.85                                 | 8197.88                                 | 4.37                       |

## **Chapter 4. Sensing performance and Mechanism**

### **4.1 Sensing performance.**

As the experiments ended, the computer recorded real-time Delta F dataes. According to Sauerbrey equation, Frequency shift can be easily changed into Mass shift. Figure S2 to Figure S6 illustrated the real-time Delta Mass-response curves of the QCM sensor coated with undecorated silica and OTMS decorated silica ( $n_{\text{OTMS}}$ =2.62 wt%, 2.74 wt%, 3.00 wt% and 4.37 wt%) when exposed to different atmosphere with increasing gas concentration.

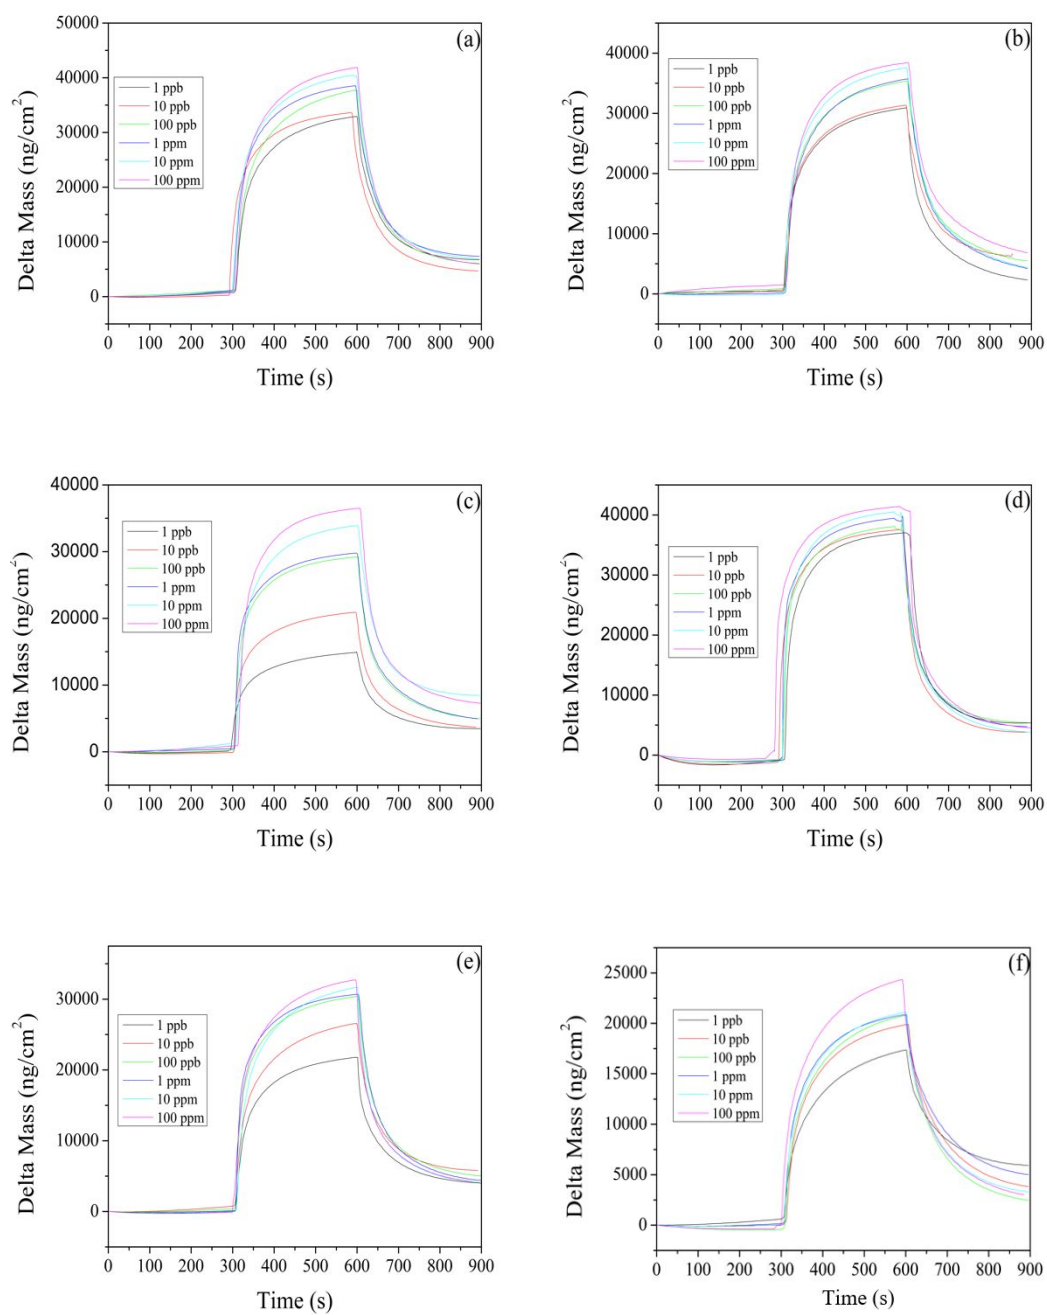

**Figure S2.** Real-time Delta Mass-response curves of the QCM sensor coated with undecorated silica exposed to different atmosphere with increasing gas concentration. (a) H<sub>2</sub>. (b) O. (c) CO<sub>2</sub>. (d) methanol. (e) ethanol and (f) isopropanol.

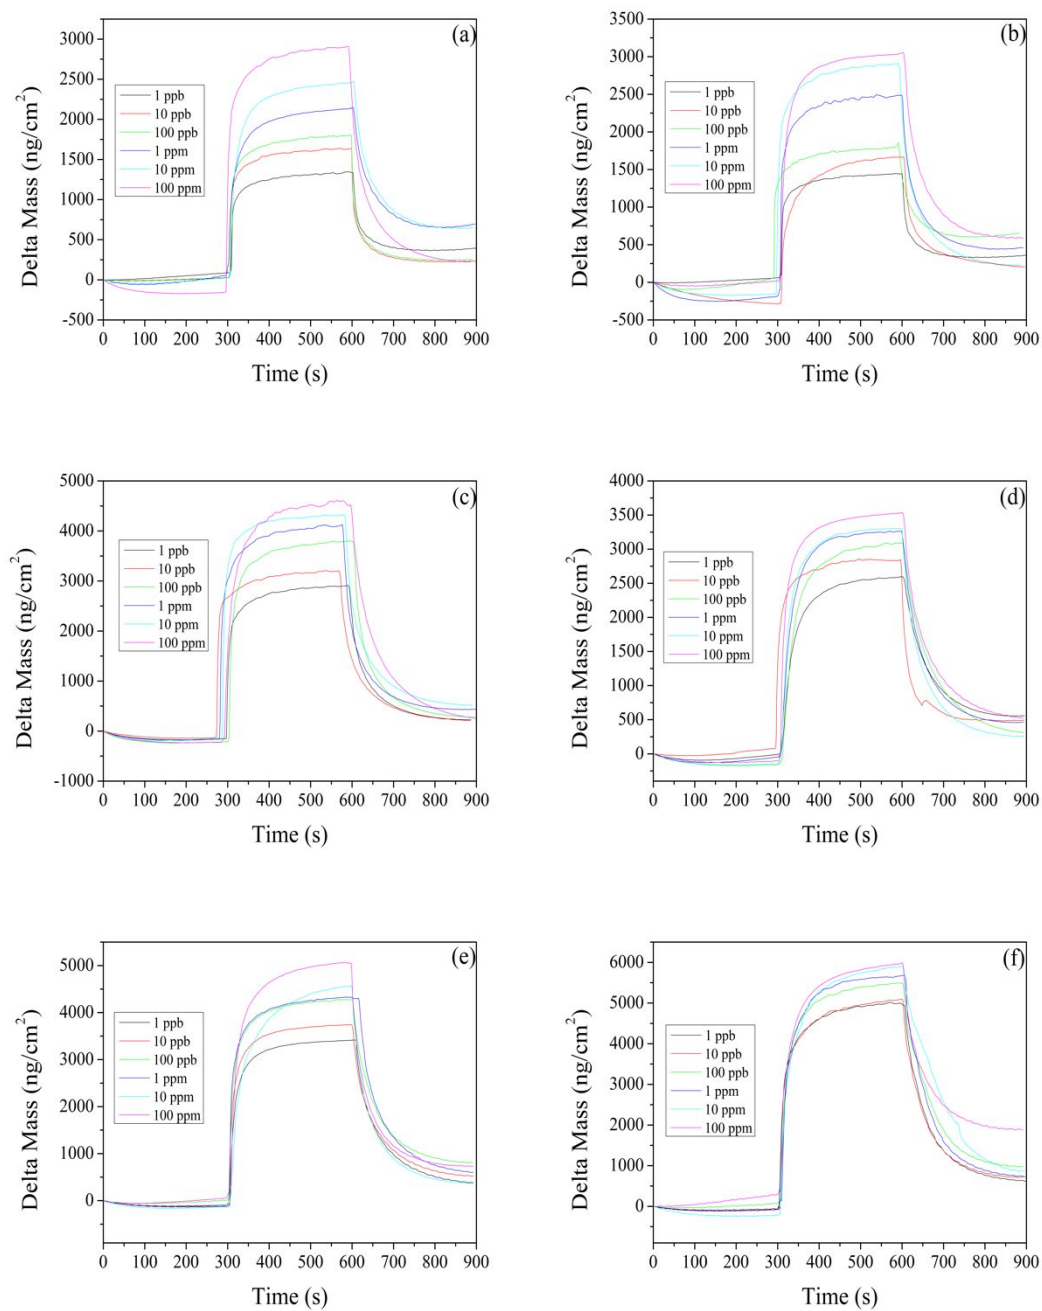

**Figure S3.** Real-time Delta Mass-response curves of the QCM sensor coated with OTMS decorated silica ( $n_{\text{OTMS}}=2.62$  wt%) exposed to different atmosphere with increasing gas concentration. (a)  $\text{H}_2$ . (b) O. (c)  $\text{CO}_2$ . (d) methanol. (e) ethanol and (f) isopropanol.

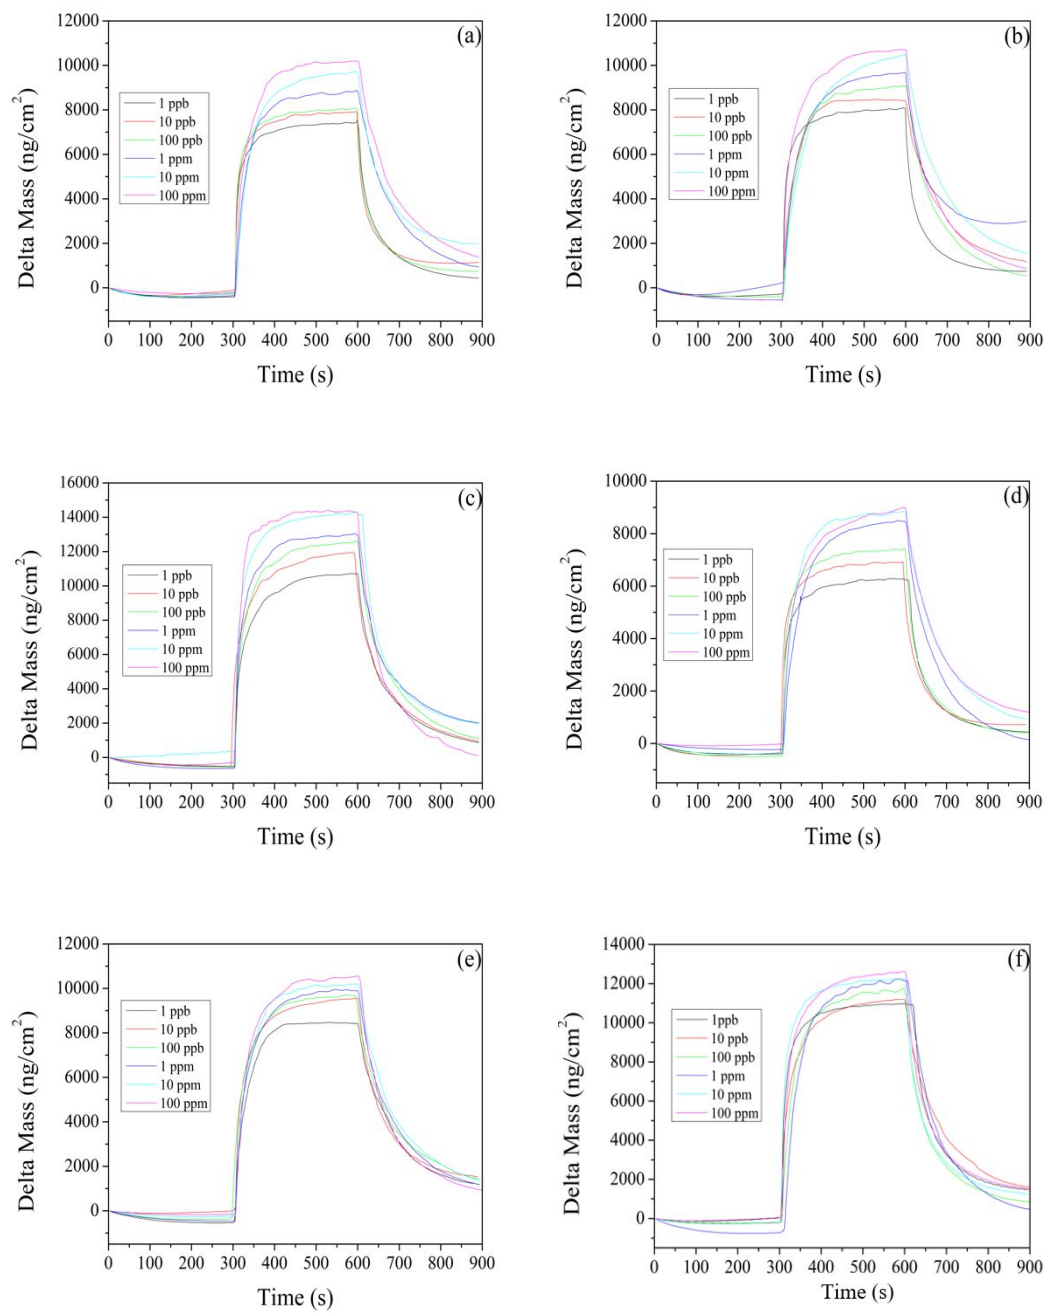

**Figure S4.** Real-time Delta Mass-response curves of the QCM sensor coated with OTMS decorated silica ( $n_{\text{OTMS}}=2.74$  wt%) exposed to different atmosphere with increasing gas concentration. (a)  $\text{H}_2$ . (b) O. (c)  $\text{CO}_2$ . (d) methanol. (e) ethanol and (f) isopropanol.

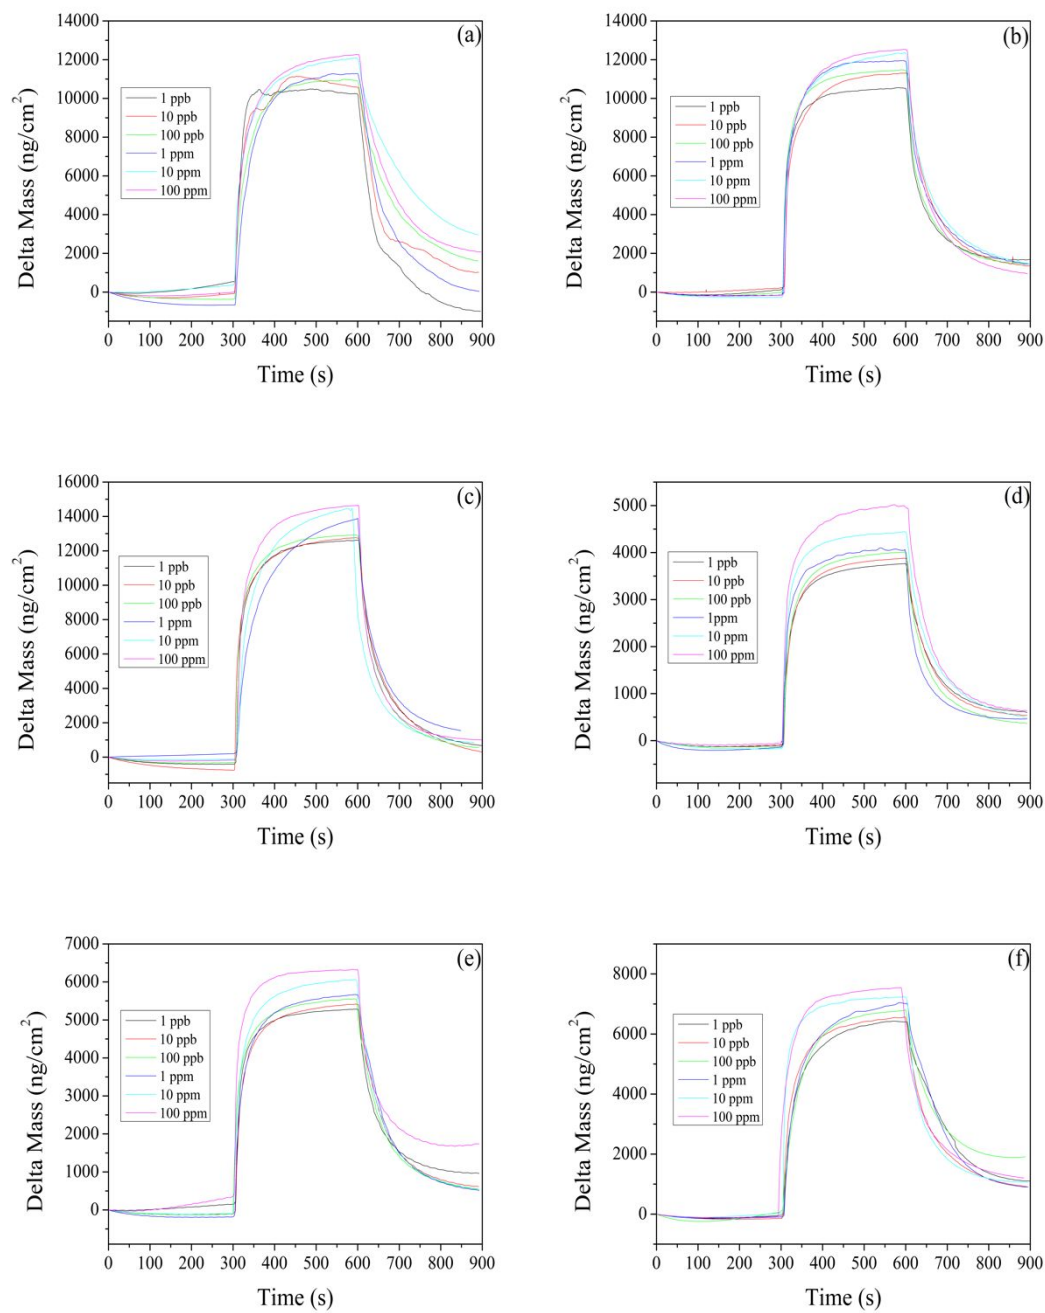

**Figure S5.** Real-time Delta Mass-response curves of the QCM sensor coated with OTMS decorated silica ( $n_{\text{OTMS}}=3.00$  wt%) exposed to different atmosphere with increasing gas concentration. (a)  $\text{H}_2$ . (b) O. (c)  $\text{CO}_2$ . (d) methanol. (e) ethanol and (f) isopropanol.

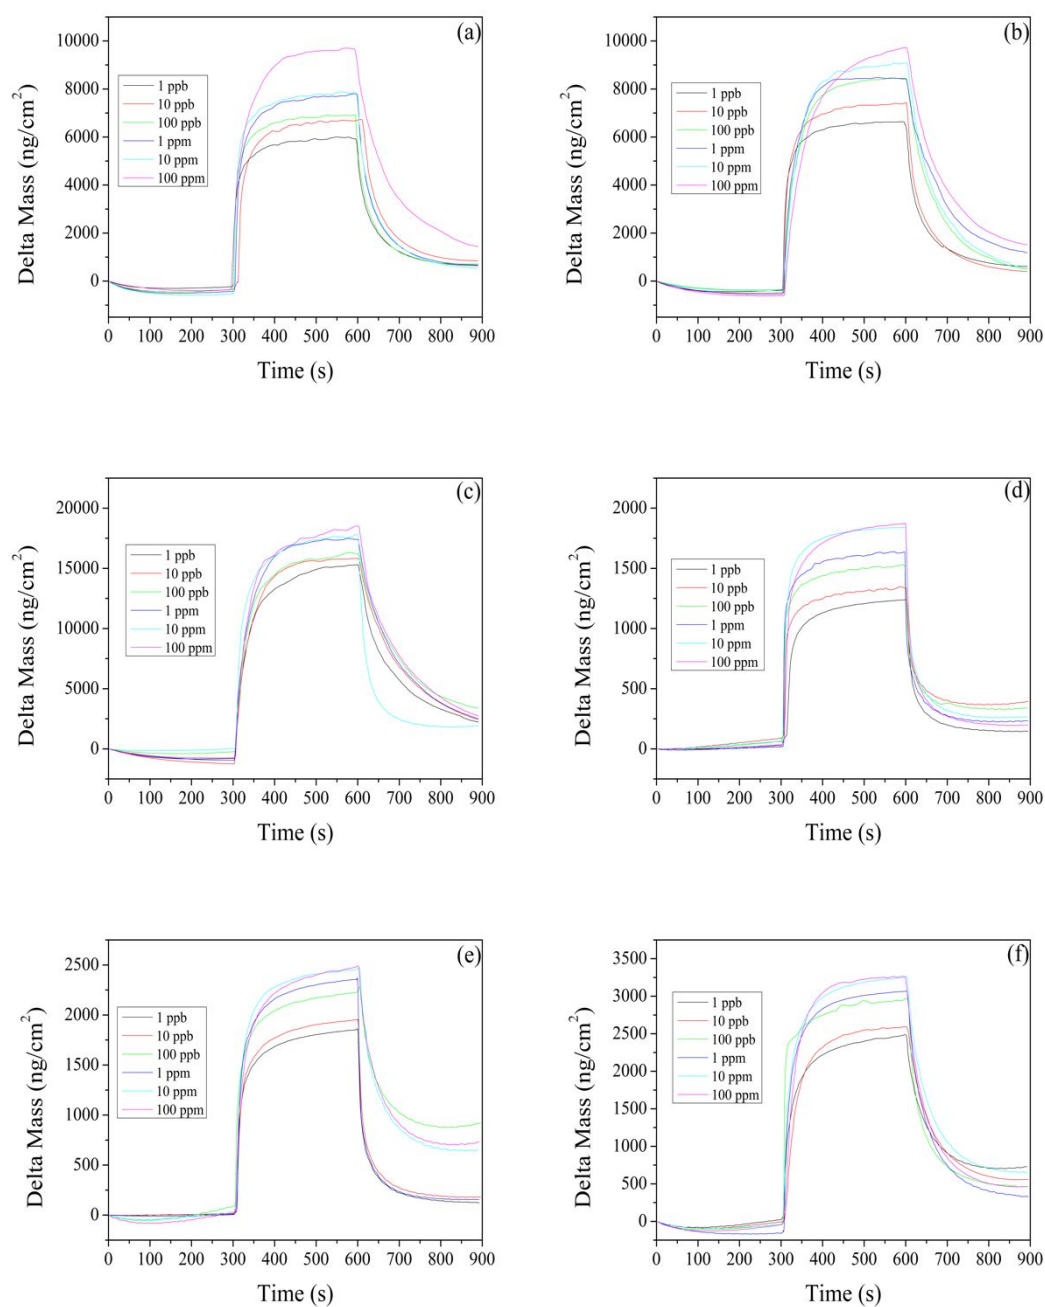

**Figure S6.** Real-time Delta Mass-response curves of the QCM sensor coated with OTMS decorated silica ( $n_{\text{OTMS}}=4.37$  wt%) exposed to different atmosphere with increasing gas concentration. (a)  $\text{H}_2$ . (b) O. (c)  $\text{CO}_2$ . (d) methanol. (e) ethanol and (f) isopropanol.

## 4.2 Sensing Mechanism.

We have also engaged the sensing performance of other nonpolar molecule ( $\text{CH}_4$ ) and polar molecules ( $\text{NO}$  and  $\text{NH}_3$ ), the results were shown as Figure S7 and Figure S8, furtherly confirmed the enhancement adsorption of nonpolar molecule on modified silica was ascribed to the nonpolar group of OTMS, while the decline adsorption of polar molecule on decorated silica was caused by the nonpolar group of OTMS.

Due to the special arrangement, silica synthesized by the vertical deposition method exhibited fine selectivity among three alcohol vapors. The Replacing models were employed to explain the sensing mechanism, which had been proposed in our previous works.<sup>3,42</sup> The difference was that as long as the liquid-vapor interface occurred, alcohol vapors would like to entered into capillary holes of undecorated silica. As for OTMS decorated silica, alcohol vapors would like to be in connection with methyl and methylene on the OTMS molecule.  $S_{\text{isopropanol,ethanol}}$  and  $S_{\text{ethanol,ethanol}}$  shift with increasing OTMS content under three states were shown as Figure S9a,b and the relative  $q$  shift among three alcohols were shown as Figure S9c-f, which could furtherly guide the sensing mechanism of  $S$ .

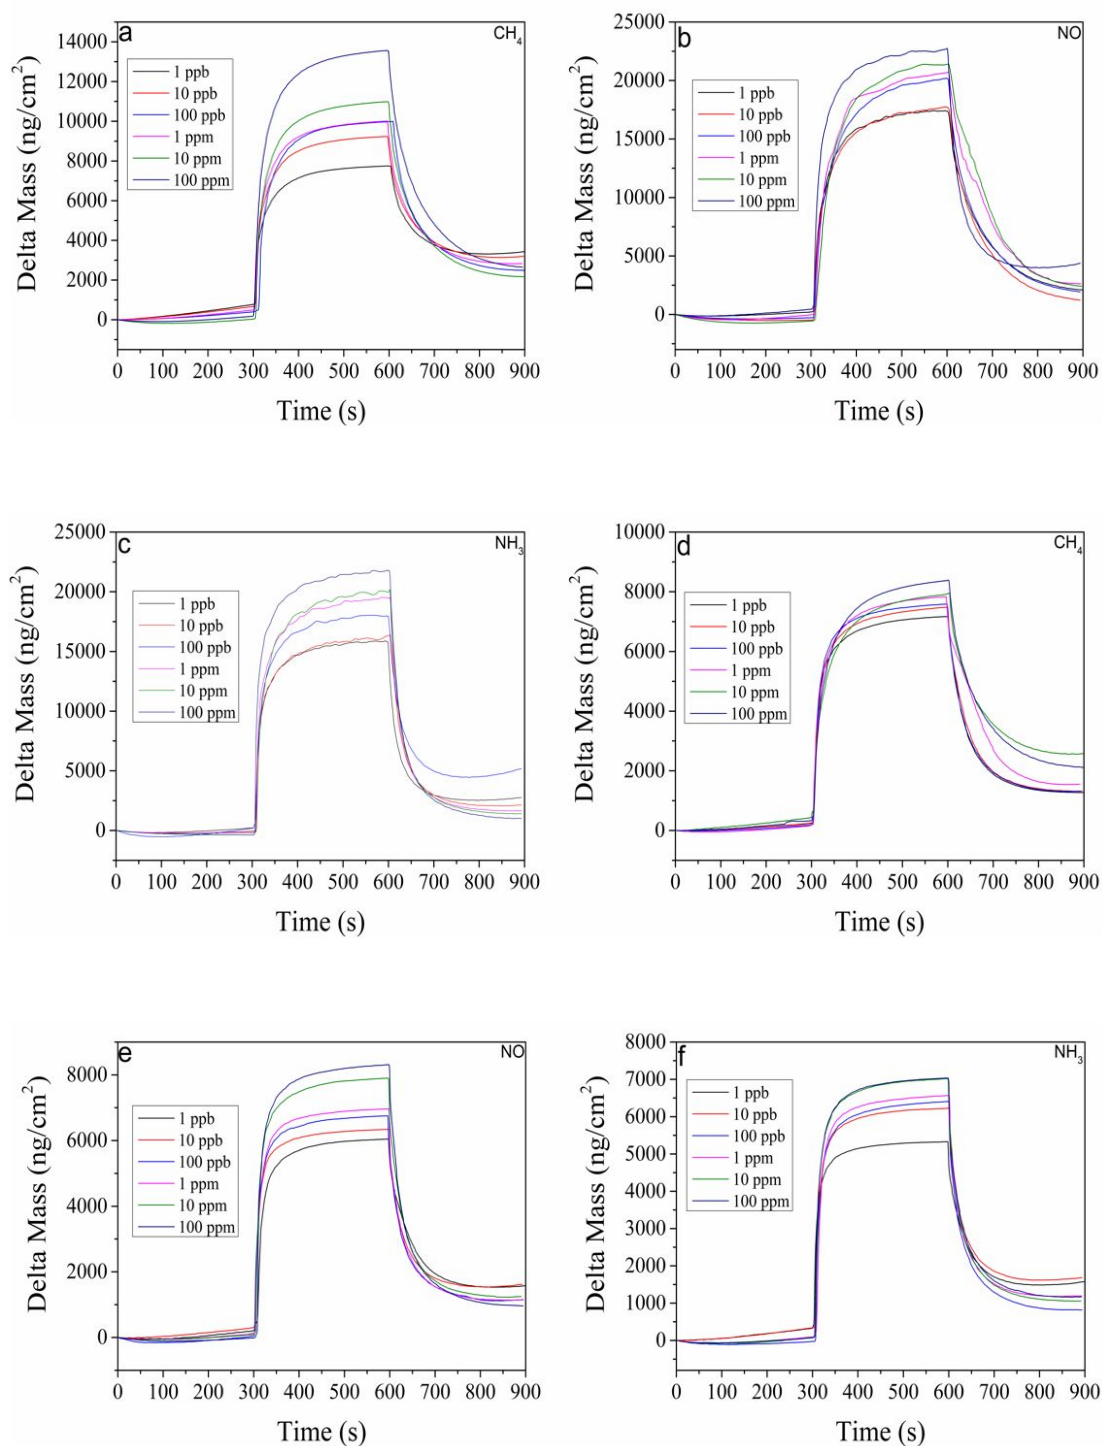

**Figure S7.** Real-time delta mass-response curves of the QCM sensor coated with silica exposed to three kinds of new small-molecule gases. (a)  $\text{CH}_4$ . (b)  $\text{NO}$ . (c)  $\text{NH}_3$ . Real-time delta mass-response curves of the QCM sensor coated with OTMS decorated silica ( $n_{\text{OTMS}}=4.37$  wt%) exposed to three kinds of new small-molecule gases. (d)  $\text{CH}_4$ . (e)  $\text{NO}$ . (f)  $\text{NH}_3$ .

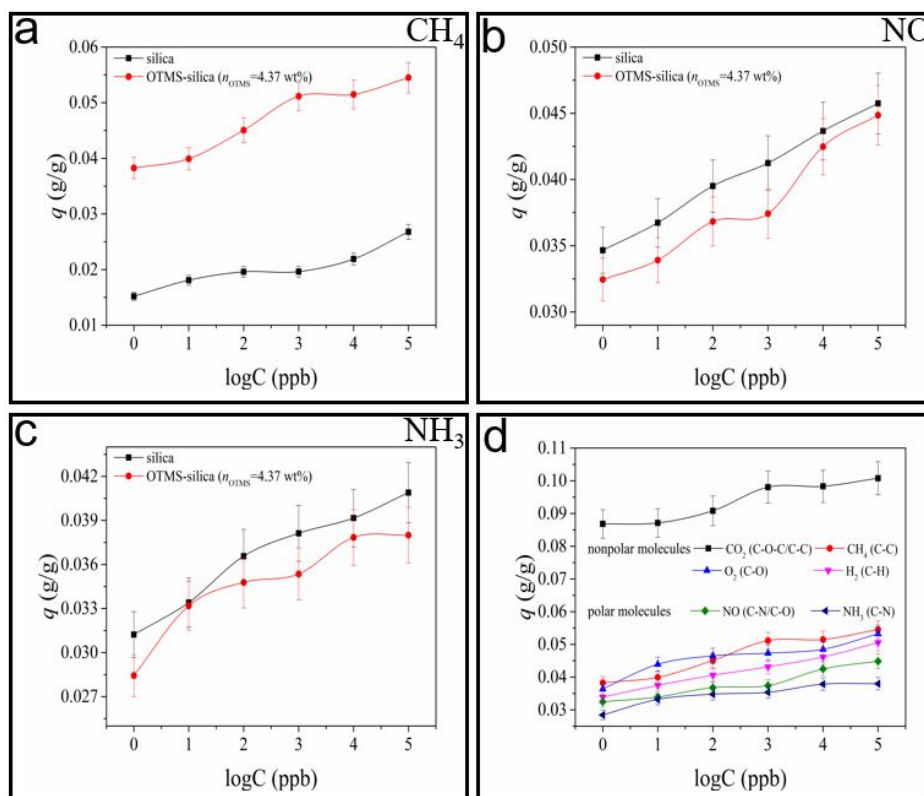

**Figure S8.**  $q$ ~ $\log C$  curves (covered error bar with  $\pm 5\%$ ) of three kinds of new small-molecule gases when QCM sensors coated with silica or OTMS decorated silica ( $n_{\text{OTMS}}=4.37$  wt%). (a)  $\text{CH}_4$ . (b)  $\text{NO}$ . (c)  $\text{NH}_3$ . (d) comparison of  $q$  (covered error bar with  $\pm 5\%$ ) of different kinds of small-molecule gases when QCM chip coated with OTMS decorated silica ( $n_{\text{OTMS}}=4.37$  wt%).

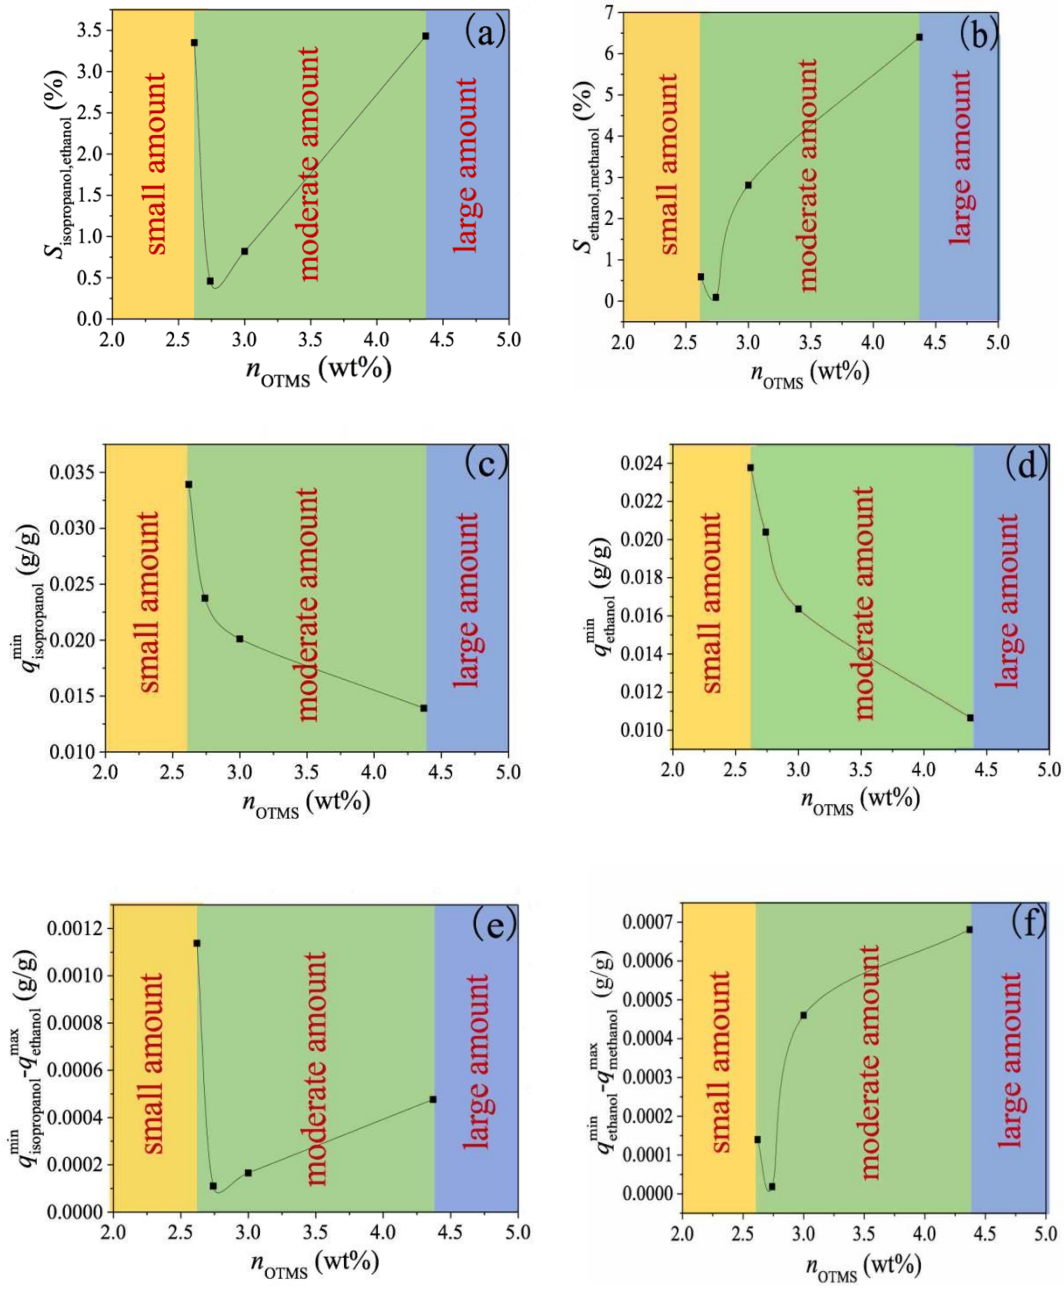

**Figure S9.** (a)-(b) The  $S$  shift when different contents of OTMS decorated silica exposed to alcohol vapors. (c)-(f) The  $q$  shift when different contents of OTMS decorated silica exposed to alcohol vapors.

### **4.3 Sensing properties of H<sub>2</sub>O and stability**

Importantly, the sensing properties of H<sub>2</sub>O were also studied, as shown in Figure S10-Figure S12, indicating that OTMS decorated silica exhibits poor adsorption performance on H<sub>2</sub>O. Besides, the repeatability and stability of OTMS decorated silica under different humidity and CO<sub>2</sub> were evaluated at room temperature (25°C), as shown in Figure S13-Figure S15, revealing fine repeatability and stability of this sensor.

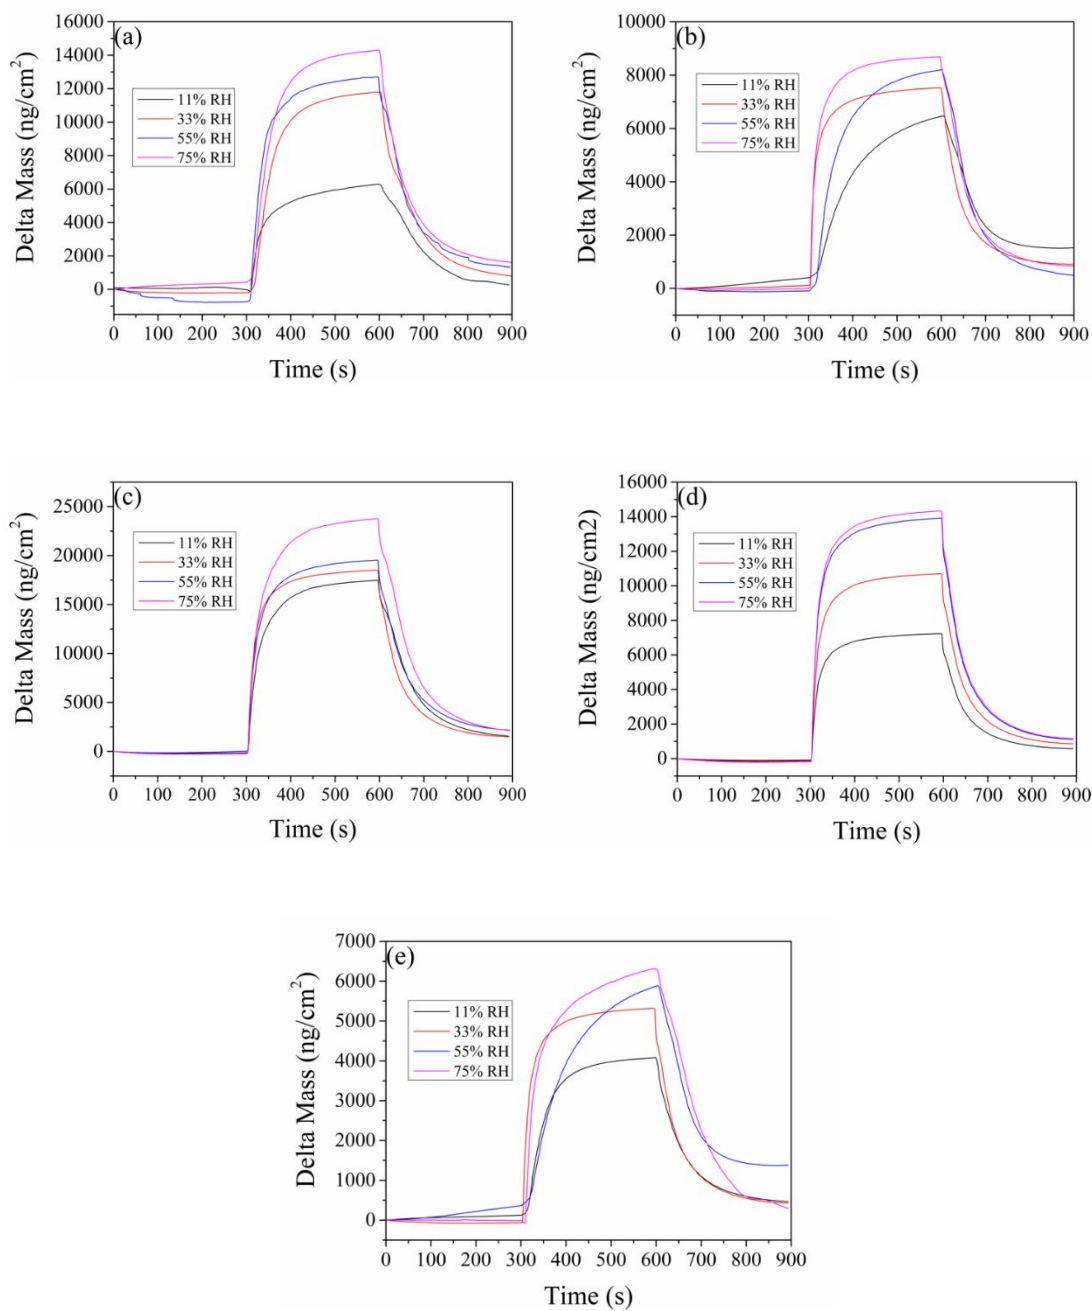

**Figure S10.** Real-time delta mass-response curves of the QCM sensor coated with different silica samples exposed to different relative humidity  $\text{H}_2\text{O}$  (a) undecorated silica, (b) OTMS decorated silica ( $n_{\text{OTMS}}=2.62$  wt%), (c) OTMS decorated silica ( $n_{\text{OTMS}}=2.74$  wt%), (d) OTMS decorated silica ( $n_{\text{OTMS}}=3.00$  wt%), (e) OTMS decorated silica ( $n_{\text{OTMS}}=4.37$  wt%).

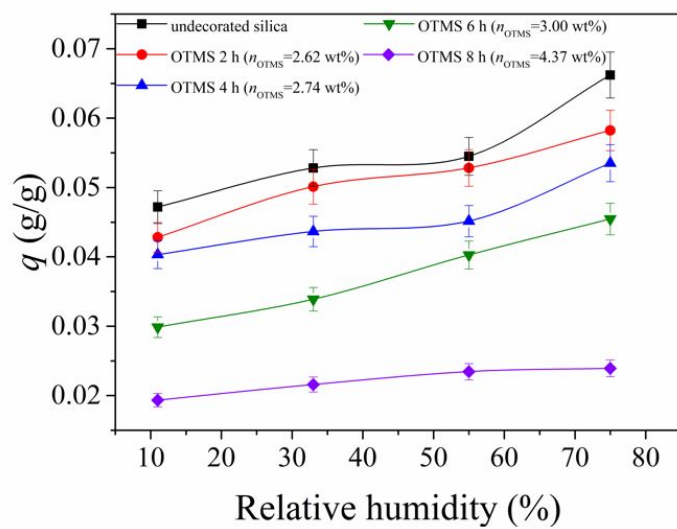

**Figure S11.**  $q \sim \log C$  curves (covered error bar with  $\pm 5\%$ ) of different silica samples exposed to different relative humidity  $\text{H}_2\text{O}$ .

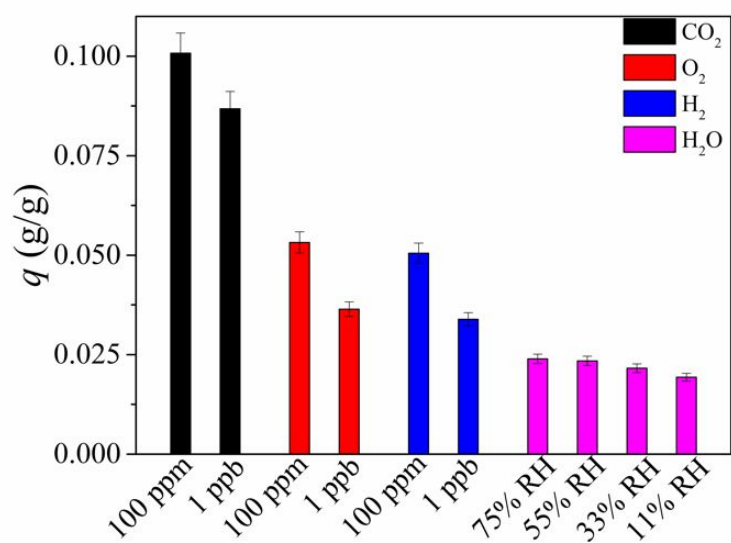

**Figure S12.** The comparison of  $q$  (covered error bar with  $\pm 5\%$ ) when OTMS decorated silica ( $n_{\text{OTMS}}=4.37$  wt%) exposed to different atmosphere of different gas concentration.

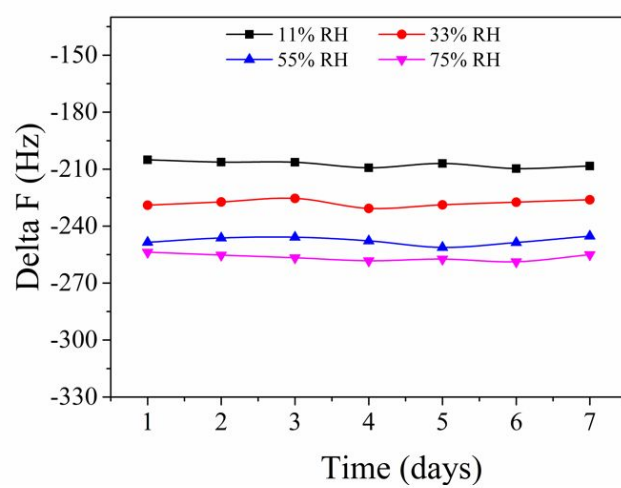

**Figure S13.** Stability of OTMS decorated silica ( $n_{\text{OTMS}}=4.37$  wt%) exposed to different humidity.

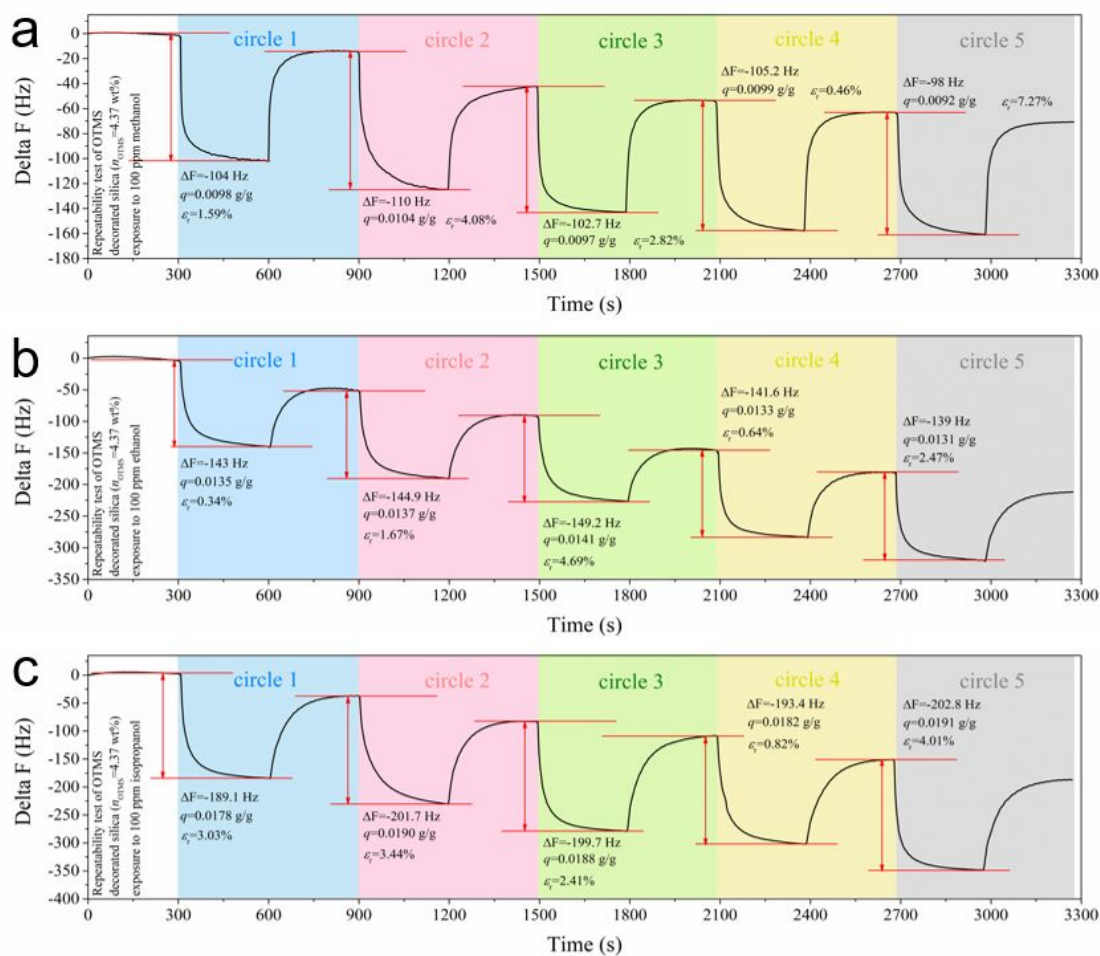

**Figure S14.** Repeatability of OTMS decorated silica ( $n_{\text{OTMS}}=4.37$  wt%) when exposed to different VOCs. (a) methanol. (b) ethanol. (c) isopropanol.

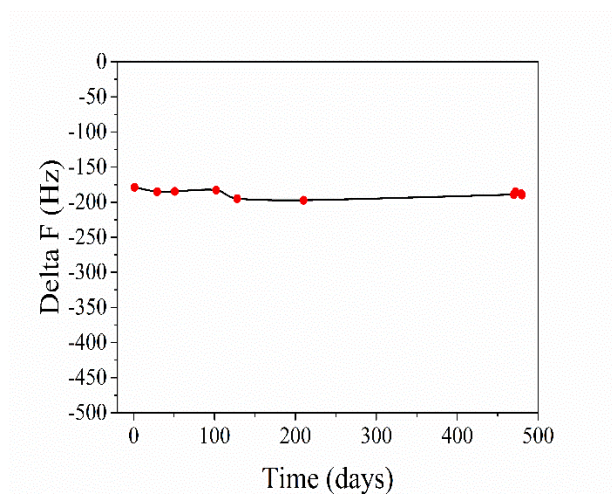

**Figure S15.** Stability of OTMS decorated silica ( $n_{\text{OTMS}}=4.37$  wt%) when exposed to 100 ppm isopropanol.

## 4.4 Fitting and Equations.

**Table S4.** Equations and  $R^2$  of CA~ $n_{\text{OTMS}}$  curve and  $q$ ~CA curves.

| CA (y)~ $n_{\text{OTMS}}$ (x) curve                |                   |                                                              |        |
|----------------------------------------------------|-------------------|--------------------------------------------------------------|--------|
| Equation                                           |                   |                                                              | $R^2$  |
| $y = -106301 \times e^{\frac{-x}{0.325}} + 127.19$ |                   |                                                              | 0.9997 |
| $q$ (y)~CA (x) curves                              |                   |                                                              |        |
| Species                                            | Gas concentration | Equation                                                     | $R^2$  |
| $\text{H}_2$                                       | 1 ppb             | $y = 8.47 \times 10^{-4}x - 0.071$                           | 0.911  |
|                                                    | 10 ppb            | $y = 8.60 \times 10^{-4}x - 0.070$                           | 0.955  |
|                                                    | 100 ppb           | $y = 9.31 \times 10^{-4}x - 0.076$                           | 0.969  |
|                                                    | 1 ppm             | $y = 9.10 \times 10^{-4}x - 0.072$                           | 0.976  |
|                                                    | 10 ppm            | $y = 9.37 \times 10^{-4}x - 0.073$                           | 0.978  |
|                                                    | 100 ppm           | $y = 9.81 \times 10^{-4}x - 0.075$                           | 0.948  |
| $\text{O}_2$                                       | 1 ppb             | $y = 8.57 \times 10^{-4}x - 0.070$                           | 0.950  |
|                                                    | 10 ppb            | $y = 9.90 \times 10^{-4}x - 0.081$                           | 0.994  |
|                                                    | 100 ppb           | $y = 1.01 \times 10^{-3}x - 0.083$                           | 0.989  |
|                                                    | 1 ppm             | $y = 9.44 \times 10^{-4}x - 0.073$                           | 0.965  |
|                                                    | 10 ppm            | $y = 9.06 \times 10^{-4}x - 0.067$                           | 0.962  |
|                                                    | 100 ppm           | $y = 1.01 \times 10^{-3}x - 0.077$                           | 0.953  |
| $\text{CO}_2$                                      | 1 ppb             | $y = 3.81 \times 10^{-8} \times e^{\frac{x}{8.827}} + 0.019$ | 0.999  |

|             |         |                                                               |       |
|-------------|---------|---------------------------------------------------------------|-------|
|             | 10 ppb  | $y = 1.47 \times 10^{-8} \times e^{\frac{x}{8.304}} + 0.022$  | 0.998 |
|             | 100 ppb | $y = 5.13 \times 10^{-10} \times e^{\frac{x}{6.814}} + 0.027$ | 0.999 |
|             | 1 ppm   | $y = 3.09 \times 10^{-10} \times e^{\frac{x}{6.603}} + 0.029$ | 0.999 |
|             | 10 ppm  | $y = 8.92 \times 10^{-10} \times e^{\frac{x}{6.992}} + 0.029$ | 0.999 |
|             | 100 ppm | $y = 3.23 \times 10^{-10} \times e^{\frac{x}{6.617}} + 0.031$ | 0.999 |
| methanol    | 1 ppb   | $y = -3.17 \times 10^{-4}x + 0.048$                           | 0.943 |
|             | 10 ppb  | $y = -3.32 \times 10^{-4}x + 0.050$                           | 0.935 |
|             | 100 ppb | $y = -4.07 \times 10^{-4}x + 0.060$                           | 0.997 |
|             | 1 ppm   | $y = -4.17 \times 10^{-4}x + 0.062$                           | 0.984 |
|             | 10 ppm  | $y = -4.20 \times 10^{-4}x + 0.063$                           | 0.993 |
|             | 100 ppm | $y = -4.05 \times 10^{-4}x + 0.062$                           | 0.969 |
| ethanol     | 1 ppb   | $y = -3.86 \times 10^{-4}x + 0.060$                           | 0.970 |
|             | 10 ppb  | $y = -4.12 \times 10^{-4}x + 0.066$                           | 0.973 |
|             | 100 ppb | $y = -4.77 \times 10^{-4}x + 0.073$                           | 0.988 |
|             | 1 ppm   | $y = -5.00 \times 10^{-4}x + 0.076$                           | 0.976 |
|             | 10 ppm  | $y = -5.02 \times 10^{-4}x + 0.077$                           | 0.961 |
|             | 100 ppm | $y = -5.46 \times 10^{-4}x + 0.083$                           | 0.935 |
| isopropanol | 1 ppb   | $y = -5.62 \times 10^{-4}x + 0.085$                           | 0.916 |
|             | 10 ppb  | $y = -5.74 \times 10^{-4}x + 0.087$                           | 0.961 |
|             | 100 ppb | $y = -5.85 \times 10^{-4}x + 0.090$                           | 0.958 |

---

|         |                                     |       |
|---------|-------------------------------------|-------|
| 1 ppm   | $y = -6.15 \times 10^{-4}x + 0.094$ | 0.934 |
| 10 ppm  | $y = -5.94 \times 10^{-4}x + 0.092$ | 0.921 |
| 100 ppm | $y = -6.30 \times 10^{-4}x + 0.097$ | 0.883 |

---

# Chapter 5. Measurements

## 5.1 Gas distribution process.

The high purity nitrogen (99.9999%) was used as diluent to dilute target gases, such as O<sub>2</sub>, CO<sub>2</sub>, and VOCs vapors. Small-molecule gases (O<sub>2</sub> and CO<sub>2</sub>) with gas concentration of 1 ppb to 10<sup>6</sup> ppm were diluted at 25°C. Especially, the high purity argon (99.9999%) was employed to dilute hydrogen. The pure alcohol vapors (methanol, ethanol and isopropanol) were obtained from alcohols evaporation at their boiling points of 65°C, 78°C, and 82°C, respectively. Then, the nitrogen was used to dilute the alcohol vapors at the same temperature. The target VOCs gases with concentration of 1 ppb to 10<sup>6</sup> ppm were cooled to 25°C before sensing measurements.

## 5.2 Sensing performance measurements.

As reference gas, nitrogen or argon (the target gas was hydrogen) was injected through the gas inlet and the frequency counter began to work. After the frequency signal was steady, the target gas (alcohol vapor or small-molecule gas) with concentration range from 1 ppb to 100 ppm was injected into QCM chamber and began the adsorption process. After 5 min, the reference gas was injected again. The desorption process also lasted 5 min and finished the adsorption-desorption measurement. The resonance frequencies were measured by the frequency counter and the data from QCM were recorded by computer.

### 5.3 Experiment environment and relative humidity test.

We have carried out the humidity response experiments at the relative humidity from 10% RH to 75% RH. According to the results (shown as Figure S16), it could not lead to large response to the change in relative humidity (from 11% to 75%). So, we thought the effect of humidity on gas sensing properties could be ignored. Furthermore, in order to keep the same measurement environment, we used a dehumidifier to maintain the environment humidity at 10% in the process of measurement.

We also carried out the gas sensing experiments when reference gases were dry nitrogen and 10 % relative humidity nitrogen. As a result (shown as Figure S17), we defined adsorption capacity ( $q$ ) (shown as Equation (2) in manuscript) and relative error as follows.

$$\varepsilon_r = \frac{|q_{(\text{dry nitrogen})} - q_{(10\% \text{ relative humidity nitrogen})}|}{q_{(\text{dry nitrogen})}} \times 100\%$$

When the dry nitrogen was used as reference gas,  $q$  is bigger than that of the reference gas of 10% RH nitrogen. But the relative error is not bigger than 5.8%. It could be explained that when the 10% RH nitrogen was employed to reference gas, some active sites on the surface of QCM may be occupied by the water molecules, resulting in decrease of  $q$ . Fortunately, the relative error was small, leading to ignore the effect of humidity on the gas sensing properties of the silica.



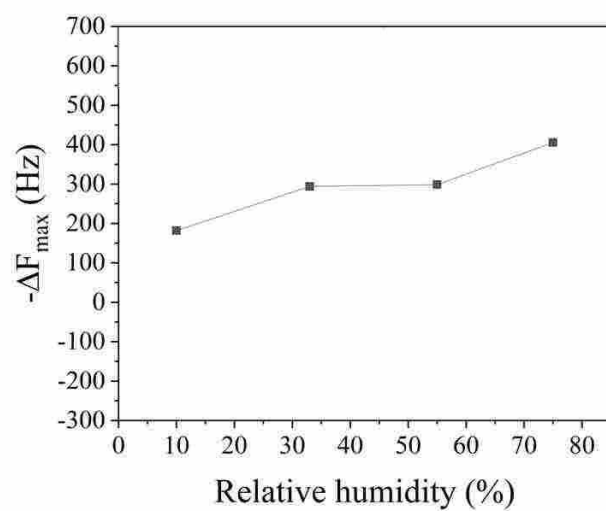

**Figure S16.** Comparison of  $-\Delta F_{\max}$  of undecorated silica when QCM exposed to different relative humidity vapors.<sup>3</sup>

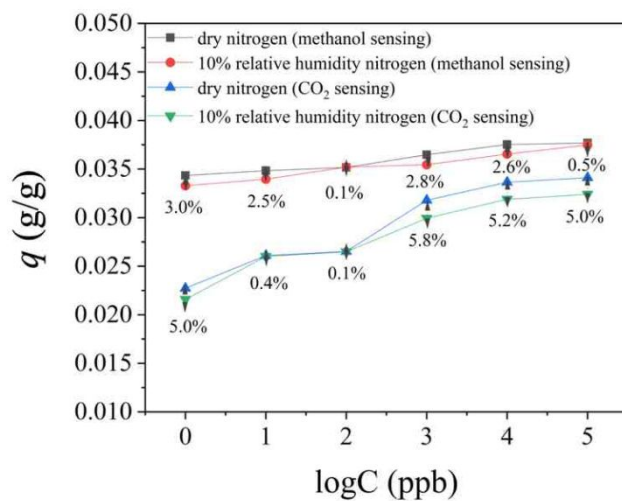

**Figure S17.** Comparison of adsorption capacity ( $q$ ) of undecorated silica by engaging dry nitrogen or 10% relative humidity nitrogen when QCM exposed to methanol and  $\text{CO}_2$ .<sup>3</sup>

# Reference

- (1) Melde, B. J.; Johnson, B. J.; Charles, P. T. Mesoporous Silicate Materials in Sensing. *Sensors* **2008**, *8*, 5202-5228.
- (2) Amonette, J. E.; Matyas, J. Functionalized Silica Aerogels for Gas-Phase Purification, Sensing, and Catalysis: A Review. *Microporous Mesoporous Mater.* **2017**, *250*, 100-119.
- (3) Xie, J.; Zhang, L.; Xing, H. Y.; Bai, P. H.; Liu, B.; Wang, C. J.; Lei, K.; Wang, H.; Peng, S.; Yang, S. Gas Sensing of Ordered and Disordered Structure SiO<sub>2</sub> and Their Adsorption Behavior Based on Quartz Crystal Microbalance. *Sens. Actuators B* **2020**, *305*, 127479.
- (4) Jia, P. G.; Fang, G. C.; Liang, T.; Hong, Y. P.; Tan, Q. L.; Chen, X. Y.; Liu, W. Y.; Xue, C. Y.; Liu, J.; Zhang, W. D.; Xiong, J. J. Temperature-Compensated Fiber-Optic Fabry-Perot Interferometric Gas Refractive-Index Sensor Based on Hollow Silica Tube for High-Temperature Application. *Sens. Actuators B* **2017**, *244*, 226-232.
- (5) Abdelghani, A.; Chovelon, J. M.; Renault, N. J.; Lacroix, M.; Gagnaire, H.; Veillas, C.; Berkova, B.; Chomat, M.; Matejec, V. Optical Fiber Sensor Coated with Porous Silica Layers for Gas and Chemical Vapour Detection. *Sens. Actuators B* **1997**, *44*, 495-498.

- (6) Kulkarni, S.; Patrikar, S. Detection of Propane Gas Adsorbed in a Nanometer Layer on Silica Nanowire. *Optik* **2016**, *127*, 465-470.
- (7) Zhao, H. R.; Zhang, T.; Qi, R. R.; Dai, J. X.; Liu, S.; Fei, T.; Lu, G. Y. Humidity Sensor Based on Solution Processible Microporous Silica Nanoparticles. *Sens. Actuators B* **2018**, *266*, 131-138.
- (8) Wang, C.; Wu, C.; Chen, I.; Huang, Y. Humidity Sensors Based on Silica Nanoparticles Aerogel Thin Films. *Sens. Actuators B* **2005**, *107*, 402-410.
- (9) Attwood, D.; Osborne, D.; Costello, B. D. L.; Ratcliffe, N.; Lam, J. Fiber Optic Oxygen Sensor for Long Term Use in Jet Fuel, Featuring Phosphorescent Dye Chemically Bonded to Functionalized Silica. *Sens. Bio-sens. Res.* **2019**, *26*, 100301.
- (10) Zong, J.; Zhang, Y. S.; Zhu, Y.; Zhu, Y.; Zhao, Y.; Zhang, W. J.; Zhu, Y. H. Rapid and Highly Selective Detection of Formaldehyde in Food Using Quartz Crystal Microbalance Sensors on Biomimetic Poly-Dopamine Functionalized Hollow Mesoporous Silica Spheres. *Sens. Actuators B* **2018**, *271*, 311-320.
- (11) Leventis, N.; Elder, I. A. Durable Modification of Silica Aerogel Monoliths with Fluorescent 2,7-Diazapyrenium Moieties. Sensing Oxygen Near the Speed of Open-Air Diffusion. *Chem. Mater.* **1999**, *11*, 2837-2845.
- (12) Leventis, N.; Rawashdeh, A. M.; Elder, I. A.; Yang, J. H.; Dass, A.; Leventis, C.

- S. Synthesis and Characterization of Ru(II) Tris(1,10-phenanthroline)-Electron Acceptor Dyads Incorporating the 4-Benzoyl-N-methylpyridinium Cation or N-Benzyl-N-methyl Viologen. Improving the Dynamic Range, Sensitivity, and Response Time of Sol-Gel-Based Optical Oxygen Sensors. *Chem. Mater.* **2004**, *16*, 1493-1506.
- (13) Plata, D. L.; Briones, Y. J.; Wolfe, R. L.; Carroll, M. K.; Bakrania, S. D.; Mandel, S. G.; Anderson, A. M. Aerogel-Platform Optical Sensors for Oxygen Gas. *J. Non-Cryst. Solids* **2004**, *350*, 326-335.
- (14) Boday, D. J.; Muriithi, B.; Stover, R. J.; Loy, D. A. Polyaniline Nanofiber-Silica Composite Aerogels. *J. Non-Cryst. Solids* **2012**, *358*, 1575-1580.
- (15) Yildirim, A.; Budunoglu, H.; Deniz, H.; Guler, M. O.; Bayindir, M. Template-Free Synthesis of Organically Modified Silica Mesoporous Thin Films for TNT Sensing. *Appl. Mater. Interface* **2010**, *2*, 2892-2897.
- (16) Wang, J. Q.; Li, Z. J.; Zhang, S.; Yan, S. N.; Cao, B. B.; Wang, Z. G.; Fu, Y. Q. Enhanced NH<sub>3</sub> Gas-Sensing Performance of Silica Modified CeO<sub>2</sub> Nanostructure Based Sensors. *Sens. Actuators B* **2018**, *255*, 862-870.
- (17) Liu, Y. P.; Chen, J. C.; Li, W.; Shen, D. K.; Zhao, Y. J.; Pal, M.; Yu, H. J.; Tu, B.; Zhao, D. Y. Carbon Functionalized Mesoporous Silica-Based Gas Sensors for Indoor Volatile Organic Compounds. *J. Colloid Interface Sci.* **2016**, *477*, 54-63.

- (18) Gaspera, E. D.; Buso, D.; Guglielmi, M.; Martucci, A.; Bello, V.; Mattei, G.; Post, M. L.; Cantalini, C.; Agnoli, S.; Granozzi, G.; Sadek, A. Z.; Kalantar-zadeh, K.; Wlodarski, W. Comparison Study of Conductometric, Optical and SAW Gas Sensors Based on Porous Sol-Gel Silica Films Doped with NiO and Au Nanocrystals. *Sens. Actuators B* **2010**, *143*, 567-573.
- (19) Armento, P.; Casciola, M.; Pica, M.; Marmottini, F.; Palombari, R.; Ziarelli, F. Silica-Zirconium Phosphate-Phosphoric Acid Composites: Preparation, Proton Conductivity and Use in Gas Sensors. *Solid State Ionics* **2004**, *166*, 19-25.
- (20) Saboor, F. H.; Khodadadi, A. A.; Mortazavi, Y.; Asgart, M. Microemulsion Synthesized Silica/ZnO Stable Core/Shell Sensors Highly Selective to Ethanol with Minimum Sensitivity to Humidity. *Sens. Actuators B* **2017**, *238*, 1070-1083.
- (21) Huang, J.; Qu, W. B.; Zhu, J. L.; Liu, H.; Wen, W.; Zhang, X. H.; Wang, S. F. Electrochemiluminescent Sensor Based on Ru(bpy)<sub>3</sub><sup>2+</sup>-Doped Silica Nanoprobe by Incorporating a New Co-Reactant NBD-Amine for Selective Detection of Hydrogen Sulfide. *Sens. Actuators B* **2019**, *284*, 451-455.
- (22) Sebok, D.; Janovak, L.; Kovacs, D.; Sapi, A.; Dobo, D. G.; Kukovecz, A.; Konya, Z.; Dekany, I. Room Temperature Ethanol Sensor with Sub-ppm Detection Limit: Improving the Optical Response by Using Mesoporous Silica Foam. *Sens. Actuators B* **2017**, *243*, 1205-1213.
- (23) Kang, J.; Kim, S. Synthesis of Quaternized Mesoporous Silica SBA-15 with

- Different Alkyl Chain Lengths for Selective Nitrate Removal from Aqueous Solutions. *Microporous Mesoporous Mater.* **2020**, 295, 109967.
- (24) Jurado-Gonzalez, M.; Sullivan, A. C.; Wilson, J. R. H. Selective Oxidations of Allylic Alcohols Using Vanadyl and Cobalt (II) Alkyl Phosphonate Modified Silicas. *Tetrahedron Lett.* **2004**, 45, 4465-4468.
- (25) Al-Hashimi, M.; Fisset, E.; Sullivan, A. C.; Wilson, J. R. H. Selective Oxidation of Sulfides to Sulfoxides Using a Silica Immobilized Vanadyl Alkyl Phosphonate Catalyst. *Tetrahedron Lett.* **2006**, 47, 8017-8019.
- (26) Inumaru, K.; Nakano, T.; Yamanaka, S. Molecular Selective Adsorption of Alkylphenols and Alkylanilines from Water by Alkyl-Grafted Mesoporous Alumina: A comparative study to alkyl-grafted mesoporous silica. *Microporous Mesoporous Mater.* **2006**, 95, 279-285.
- (27) Wang, Z. K.; Zhu, Y. Y.; Chen, H. T.; Wu, H. L.; Ye, C. L. Fabrication of Three Functionalized Silica Adsorbents: Impact of Co-Immobilization of Imidazole, Phenyl and Long-Chain Alkyl Groups on Bisphenol A Adsorption From High Salt Aqueous Solutions. *J. Taiwan Inst. Chem. E.* **2018**, 86, 120-132.
- (28) Srinivasan, G.; Muller, L. Influence of Solvents on the Conformational Order of C<sub>18</sub> Alkyl Modified Silica Gels. *J. Chromatogr. A* **2006**, 1110, 102-107.
- (29) Poovarodom, S.; Poovarodom, S.; Berg, J. C. Effect of Alkyl Functionalization on

- Charging of Colloidal Silica in Apolar Media. *J. Colloid Interface Sci.* **2010**, *351*, 415-420.
- (30) Sanchez-Milla, M.; Gomez, R.; Perez-Serrano, J.; Sanchez-Nieves, J.; Mata, F. J. D. L. Functionalization of Silica with Amine and Ammonium Alkyl Chains, Dendrons and Dendrimers: Synthesis and Antibacterial Properties. *Mat. Sci. Eng. C* **2020**, *109*, 110526.
- (31) Zhang, C. Y.; Liu, Y.; Sun, Y. Biochem. Lipase Immobilized to a Short Alkyl Chain-Containing Zwitterionic Polymer Grafted on Silica Nanoparticles: Moderate Activation and Significant Increase of Thermal Stability. *Eng. J.* **2019**, *146*, 124-131.
- (32) Maede, H.; Mokuno, T.; Isu, N.; Kasuga, T. Thermal Properties of Silica-Based Hybrids with Different Alkyl Chains. *Ceram. Int.* **2017**, *43*, 880-883.
- (33) Ali, A.; Ali, F.; Cheong, W. J. Sedimentation Assisted Preparation of Ground Particles of Silica Monolith and Their C18 Modification Resulting in a Chromatographic Phase of Improved Separation Efficiency. *J. Chromatogr. A* **2017**, *1525*, 79-86.
- (34) El-Sheikh, A. H.; Sweileh, J. A.; Al-Degs, Y. S.; Insisi, A. A.; Al-Rabady, N. Critical Evaluation and Comparison of Enrichment Efficiency of Multi-Walled Carbon Nanotubes, C18 Silica and Activated Carbon Towards Some Pesticides from Environmental Waters. *Talanta* **2008**, *74*, 1675-1680.

- (35) Gwarda, R. L.; Aletanska-Kozak, M.; Matosiuk, D.; Dzido, T. H. Inversion of Type Separation System in Planar Chromatography of Peptides, Using C18 Silica-Based Adsorbents. *J. Chromatogr. A* **2016**, *1440*, 240-248.
- (36) Thirumalai, M.; Kumar, S. N.; Prabhakaran, D.; Sivaraman, N.; Maheswari, M. A. Dynamically Modified C<sub>18</sub> Silica Monolithic Column for the Rapid Determinations of Lead, Cadmium and Mercury Ions by Reversed-Phase High-Performance Liquid Chromatography. *J. Chromatogr. A* **2018**, *1569*, 62-69.
- (37) Huang, D. N.; Wang, X. Y.; Deng, C. H.; Song, G. X.; Cheng, H. F.; Zhang, X. M. Facile Preparation of Raisin-Bread Sandwich-Structured Magnetic Graphene/Mesoporous Silica Composites with C18-Modified Pore-Walls for Efficient Enrichment of Phthalates in Environmental Water. *J. Chromatogr. A* **2014**, *1325*, 65-71.
- (38) Lhuillier, J.; Martin, C.; Ressler, L.; Peyrade, J. P.; Grisolia, J.; Respaud, M. Elaboration of 1  $\mu$ m Square Arrays of Octadecyltrimethoxysilane Monolayers on SiO<sub>2</sub>/Si by Combining Chemical Vapour Deposition and Nano-Imprint Lithography. *Superlattices Microstruct.* **2004**, *36*, 227-233.
- (39) Zhang, X. Y.; Wang, C. Q.; Chai, W. B.; Liu, X. Y.; Zhang, Y. M. Fabrication of Superhydrophobic Kapok Fiber Using CeO<sub>2</sub> and Octadecyltrimethoxysilane. *Environ. Eng. Sci.* **2016**, *35*, 696-702.
- (40) Pan, H.; Wang, X. D.; Xiao, S. S.; Yu, L. G.; Zhang, Z. J. Preparation and

Characterization of TiO<sub>2</sub> Nanoparticles Surface-Modified by Octadecyltrimethoxysilane. *Indian J. Eng. Mater. Sci.* **2013**, 20, 561-567.

(41) Zeng, J. B.; Liu, H. H.; Chen, J. M.; Huang, J. L.; Yu, J. F.; Wang, Y. R.; Chen, X. Octadecyltrimethoxysilane Functionalized ZnO Nanorods as a Novel Coating for Solid-Phase Microextraction with Strong Hydrophobic Surface. *Analyst* **2012**, 137, 4295.

(42) Xie, J.; Duan, M.; Bai, P. H.; Lei, K.; Yang, C.; Liu, B.; Zhang, L.; Tang, J. L.; Wang, Y. Y.; Wang, H. Gas-Sensing Mechanism of Silica with Photonic Bandgap Shift. *Anal. Chem.* **2019**, 91, 1133-1139.
